# Supplementary material
Source: publisher figshare collection journal article supplement (https://acs.figshare.com/ndownloader/files/3847420)
Supplement: Supplementary file 1 [file 3847420]

# Supporting Information

## Robust Biomimetic-Structural Superhydrophobic Surface on Aluminum Alloy

Lingjie Li,<sup>†,‡</sup> Tao Huang,<sup>†,‡</sup> Jinglei Lei,<sup>\*,†</sup> Jianxin He,<sup>†</sup> Linfeng Qu,<sup>†</sup> Peiling Huang,<sup>†</sup>  
Wei Zhou,<sup>†</sup> Nianbing Li,<sup>‡</sup> and Fusheng Pan<sup>§</sup>

<sup>†</sup>School of Chemistry and Chemical Engineering, Chongqing University, Chongqing  
400044 People's Republic of China

<sup>‡</sup>School of Chemistry and Chemical Engineering, Southwest University, Chongqing  
400715 People's Republic of China

<sup>§</sup>School of Materials Science and Engineering, Chongqing University, Chongqing  
400044 People's Republic of China

### AUTHOR INFORMATION

#### Corresponding Author

Jinglei Lei, E-mail: [JLLei@cqu.edu.cn](mailto:JLLei@cqu.edu.cn).

Tel.: +86 13983064116. Fax: +86 23 65112328.

**S1 Abrasion resistance test.** The abrasion resistance of the sample surface was evaluated by a scratch test that previously reported.<sup>1,2</sup> Figure S1 schematically illustrates the test process, which was carried out on a homemade scratch tester with 800# grit emery papers as an abrasion surface. The sample surface was tested facing this abrasion material with varying applied load and distance at a rate of  $5\text{mm s}^{-1}$ .

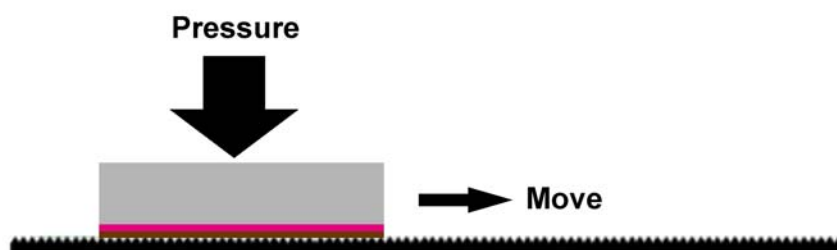

Figure S1. Schematic illustration of the scratch test.

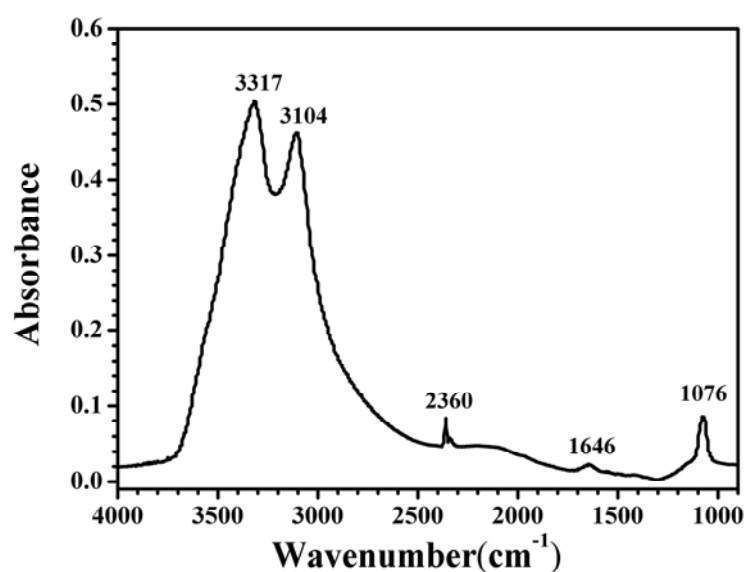

Figure S2. FTIR spectrum of 2024 Al sample after a hydrothermal treatment in a  $\text{La}(\text{NO}_3)_3$  aqueous solution.

Figure S2 shows the FTIR result of 2024 Al sample after a hydrothermal treatment in a  $\text{La}(\text{NO}_3)_3$  aqueous solution. The intensive bands at  $3317\text{ cm}^{-1}$ ,  $3104\text{ cm}^{-1}$  and  $1076\text{ cm}^{-1}$  can be assigned to the tension of the hydroxyl groups of hydroxides of lanthanum and aluminum.<sup>3-5</sup> The weak band at  $1646\text{ cm}^{-1}$  can be assigned to the stretching and bending modes of the adsorbed water,<sup>3,6</sup> and the band at  $2360\text{ cm}^{-1}$  ascribed to the adsorbed  $\text{CO}_2$ .<sup>3,7</sup>

## References

- (1) Su, F.; Yao, K. Facile Fabrication of Superhydrophobic Surface with Excellent Mechanical Abrasion and Corrosion Resistance on Copper Substrate by a Novel Method. *ACS Appl. Mater. Interfaces* **2014**, *6*, 8762–8770.
- (2) She, Z.; Li, Q.; Wang, Z.; Li, L.; Chen, F.; Zhou, J. Researching the Fabrication of Anticorrosion Superhydrophobic Surface on Magnesium Alloy and Its Mechanical Stability and Durability. *Chem. Eng. J.* **2013**, *228*, 415-424.
- (3) Li, L.; Zhang, Y.; Lei, J.; He, J.; Lv, R.; Li, N.; Pan, F. Water-Only Hydrothermal Method: a Generalized Route for Environmentally-Benign and Cost-Effective Construction of Superhydrophilic Surfaces with Biomimetic Micronanostructures on Metals and Alloys. *Chem. Commun.*, **2014**, *50*, 7416-7419.
- (4) Ji, G.; Li, M.; Li, G.; Gao, G.; Zou, H.; Gan, S.; Xu, X. Hydrothermal Synthesis of Hierarchical Micron Flower-Like  $\gamma$ -AlOOH and  $\gamma$ -Al<sub>2</sub>O<sub>3</sub> Superstructures from Oil Shale Ash. *Powder Technol.* **2012**, *215-216*, 54-58.
- (5) Zhang, L.; Lu, W.; Cui, R.; Shen, S. One-Pot Template-Free Synthesis of Mesoporous Boehmite Core–Shell and Hollow Spheres by a Simple Solvothermal Route. *Mater. Res. Bull.* **2010**, *45*, 429-436.
- (6) Hou, H.; Xie, Y.; Yang, Q.; Guo, Q.; Tan, C. Preparation and Characterization of  $\gamma$ -AlOOH Nanotubes and Nanorods. *Nanotechnology* **2005**, *16*, 741-745.
- (7) Zukal, A.; Arian, C. O.; Delgado, M. R.; Nachtigall, P.; Pulido, A.; Mayerova, J.;

Cejka, J. Combined Volumetric, Infrared Spectroscopic and Theoretical Investigation of CO<sub>2</sub> Adsorption on Na-A Zeolite. *Microporous Mesoporous Mat.* **2011**, *146*, 97-105.
